# Supplementary material for: The Domain Landscape of Virus-Host Interactomes
Source: Biomed Res Int. 2014 Jun 4;2014:867235. doi: 10.1155/2014/867235 (PMC4065681; doi:10.1155/2014/867235)
Supplement: Supplementary file 1 — The supplementary materials include detailed statistics of intraspecies and interspecies of PPIs and DDIs (Supplementary Table 1). The supplementary materials also include GO enrichment results for different host domain sets by topGO, including BP, MF and CC. We computed enriched GO terms for each species, genera, family, type and all of viruses, and “1” in each cell means the corresponding GO term is enriched (P<0.05), otherwise 0 (Supplementary Table 2). Supplementary Table 3 and 4 are ranked gene and domain lists according to their cumulative normalized scores. [file 867235.f1.zip]

Archive with 4 entries (4 files):
- 867235.f1/Supplementary Table 1.xls
- 867235.f1/Supplementary Table 2.xls
- 867235.f1/Supplementary Table 3.xls
- 867235.f1/Supplementary Table 4.xls
